# Urocortin-1 within the Centrally-Projecting Edinger-Westphal Nucleus Is Critical for Ethanol Preference

William J. Giardino, Davelle L. Cocking, Simranjit Kaur, Christopher L. Cunningham, Andrey E. Ryabinin\*

Department of Behavioral Neuroscience and Portland Alcohol Research Center, Oregon Health & Science University, Portland, Oregon, United States of America

## Abstract

Converging lines of evidence point to the involvement of neurons of the centrally projecting Edinger-Westphal nucleus (EWcp) containing the neuropeptide Urocortin-1 (Ucn1) in excessive ethanol (EtOH) intake and EtOH sensitivity. Here, we expanded these previous findings by using a continuous-access, two-bottle choice drinking paradigm (3%, 6%, and 10% EtOH vs. tap water) to compare EtOH intake and EtOH preference in Ucn1 genetic knockout (KO) and wild-type (WT) mice. Based on previous studies demonstrating that electrolytic lesion of the EWcp attenuated EtOH intake and preference in high-drinking C57BL/6J mice, we also set out to determine whether EWcp lesion would differentially alter EtOH consumption in Ucn1 KO and WT mice. Finally, we implemented well-established place conditioning procedures in KO and WT mice to determine whether Ucn1 and the corticotropin-releasing factor type-2 receptor (CRF-R2) were involved in the rewarding and aversive effects of EtOH (2 g/kg, i.p.). Results from these studies revealed that (1) genetic deletion of Ucn1 dampened EtOH preference only in mice with an intact EWcp, but not in mice that received lesion of the EWcp, (2) lesion of the EWcp dampened EtOH intake in Ucn1 KO and WT mice, but dampened EtOH preference only in WT mice expressing Ucn1, and (3) genetic deletion of Ucn1 or CRF-R2 abolished the conditioned rewarding effects of EtOH, but deletion of Ucn1 had no effect on the conditioned aversive effects of EtOH. The current findings provide strong support for the hypothesis that EWcp-Ucn1 neurons play an important role in EtOH intake, preference, and reward.

**Citation:** Giardino WJ, Cocking DL, Kaur S, Cunningham CL, Ryabinin AE (2011) Urocortin-1 within the Centrally-Projecting Edinger-Westphal Nucleus Is Critical for Ethanol Preference. *PLoS ONE* 6(10): e26997. doi:10.1371/journal.pone.0026997

**Editor:** Judith Homberg, Radboud University, The Netherlands

**Received:** September 8, 2011; **Accepted:** October 7, 2011; **Published:** October 28, 2011

**Copyright:** © 2011 Giardino et al. This is an open-access article distributed under the terms of the Creative Commons Attribution License, which permits unrestricted use, distribution, and reproduction in any medium, provided the original author and source are credited.

**Funding:** This research was supported by NIH grants to AER (AA013738, AA016647, AA010760) and WJG (T32 DA7262-20) and CLC (AA007702). The funders had no role in study design, data collection and analysis, decision to publish, or preparation of the manuscript.

**Competing Interests:** The authors have declared that no competing interests exist.

\* E-mail: ryabinin@ohsu.edu

## Introduction

Compulsive use of alcohol (ethanol; EtOH) is thought to arise from EtOH-induced adaptations within several neural circuits that together lead to a persistent dysregulation of drug-seeking [1]. Efforts to characterize the maladaptive changes underlying this phenomenon have identified numerous brain regions and neurotransmitter systems that work in concert to drive EtOH reward, excessive EtOH intake, and EtOH withdrawal [2–4].

While earlier studies utilized experimenter-administered EtOH to map brain areas thought to be important for sensitivity to the behavioral effects of EtOH, more recent experiments have improved the face validity of this approach (and narrowed the list of candidate brain regions) by implementing self-administration procedures. Specifically, while neural mapping studies showed that experimenter-administered EtOH induced expression of the transcription factor c-Fos in several brain areas [5–8], the Edinger-Westphal nucleus (EW) was the only brain area that, across multiple strains and species of rodents, also showed elevated c-Fos expression following oral self-administration of EtOH [9–17].

The EW is a compact region within the ventromedial periaqueductal gray that extends along the midline between the caudal division of the ventral tegmental area and the rostral division of the dorsal raphe nucleus. While this nucleus has been historically described as a cholinergic population of preganglionic neurons controlling oculomotor functions, more detailed

examinations have revealed that the EW is comprised of two distinct (yet partially overlapping) nuclei, designated EWpg for the preganglionic oculomotor neurons, and EWcp for the centrally-projecting, neuropeptide-containing neurons [18–21]. Following the initial studies that characterized the unique sensitivity of the EW to EtOH-drinking, we repeatedly showed that EtOH-induced expression of c-Fos in the EW was restricted almost completely to EWcp neurons containing the neuropeptide Urocortin-1 (Ucn1) [13,22,23].

Ucn1 is a member of the corticotropin-releasing factor (CRF) family of endogenous ligands (along with CRF, Ucn2, and Ucn3), and is distinguished from its related peptides by the fact that it binds to both CRF receptor subtypes (CRF-R1, CRF-R2) with high affinity [24,25]. Given the prior literature implicating a role for CRF systems in excessive EtOH intake following dependence [26] and stress-induced relapse of EtOH-seeking [27], we hypothesized that EWcp-Ucn1 neurons might also contribute toward behavioral phenotypes relevant to alcoholism.

This hypothesis was later validated by data from our laboratory demonstrating that EWcp-Ucn1 protein levels were differentially expressed between rodent lines that had been selectively-bred for divergent EtOH phenotypes. In general, these studies indicated that stronger expression of EWcp-Ucn1 peptide was associated with a genetic predisposition toward high EtOH intake [14,28,29] and heightened sensitivity to some (reward, hypothermia, sedation), but not all (locomotor stimulation) EtOH-related phenotypes

[22,30–32]. Furthermore, we found that electrolytic lesions of the EWcp in high-drinking C57BL/6J (B6) mice attenuated intake and preference of EtOH (but not sucrose, quinine, saccharin, or saline) in a two-bottle choice (2-BC) drinking paradigm [33,34]. Together, these studies provided converging lines of evidence to support the claim that EWcp-Ucn1 neurons play an important role in EtOH sensitivity and EtOH consumption [31].

However, because several other neuropeptide systems co-exist with Ucn1 in the EWcp [35–39], the possibility remained that EWcp lesion altered EtOH consumption via a Ucn1-independent mechanism (i.e., through a different neuropeptide or receptor expressed in EWcp). Thus, in order to determine whether the effects of EWcp lesion could be attributed specifically to Ucn1, the present studies compared the effects of EWcp lesion on 2-BC intake and preference between mice lacking Ucn1 and their wild-type littermates. In addition, we set out to test whether genetic deletion of Ucn1 would decrease EtOH drinking, EtOH-induced reward, and EtOH-induced aversion in mice containing an intact EWcp. Finally, we also tested whether genetic deletion of CRF-R2 would alter EtOH-induced reward. The findings presented herein shed additional light on the contribution of the EWcp to EtOH intake, and provide further evidence that Ucn1 is an important neuropeptide for mediating the EWcp's effects on EtOH preference and reward.

## Materials and Methods

### Animals

All protocols were approved by the Oregon Health & Science University animal care and use committee (protocol A828), and were performed with strict adherence to the National Institutes of Health Guidelines for the Care and Use of Laboratory Animals. We used single gene mutant mice created from embryonic stem cells that underwent targeted gene inactivation. Ucn1 knockout (KO) mice generated on a 129×1/SvJ × C57BL/6J (B6) background contained a deletion of exon 2 of the *Ucn* gene [40], and CRF-R2 KO mice generated on a 129×1/SvJ × B6 background contained a deletion of exons 3–4 of the *Chr2* gene [41]. Colonies were maintained by backcrossing onto a B6 genetic background. The Ucn1 KO line was backcrossed onto a B6 background for 10–12 generations, and the CRF-R2 KO line was backcrossed onto a B6 background for 14 generations. KO and wild-type (WT) mice used for these studies were littermates, generated by heterozygous matings. Mice were weaned at 28–32 days of age, isosexually housed, and either underwent surgery at 9–16 weeks of age (EtOH drinking procedures) or underwent behavioral testing at 8–14 weeks of age (EtOH conditioning procedures). Importantly, genetic deletion of either Ucn1 or CRF-R2 does not alter the rate of EtOH elimination [42,43]. All mice received *ad libitum* access to food (LabDiet 5001; LabDiet, Richmond, IN) and water, with the exception of time spent in the behavioral apparatus (EtOH conditioning experiments only) and remained on a 12 h light-dark schedule (lights on at 0700 h).

Mice on a B6 genetic background are well-known for their high levels of EtOH intake and preference, and are the ideal choice for EtOH drinking studies, particularly 2-BC drinking studies [44]. While mice on a DBA/2J background generally exhibit more robust levels of EtOH place conditioning than mice on a B6 background [45], we chose to use mice on a B6 genetic background in order to produce data that would be comparable to 2-BC drinking experiments, as well as to avoid the time-consuming and expensive process of backcrossing our KO mice onto a DBA/2J background.

### Surgical Procedures

EWcp lesion surgery was performed similar to previous reports [33,34] in male Ucn1 KO and WT littermate mice. Immediately prior to surgery, mice were given a subcutaneous injection of Rimadyl (Carprofen; 5 mg/kg). Mice were placed under isoflurane anesthesia, secured in a stereotaxic apparatus, and received either electrolytic lesion of the EWcp or sham surgery. For both operations, a small hole was drilled through the skull on the midline (−3.4 mm, A/P; a coordinate that lies halfway along the rostral-caudal axis of the EWcp) and a stainless steel electrode (SNE-300, Rhodes Medical Instruments, Inc., Woodland Hills, CA) was guided down into the EWcp nucleus (−3.9 mm, D/V). The electrode was connected to the positive terminal of a lesion-making device (Model 3500, Ugo Basile, Comerio, Italy). To ground the animal, the negative terminal was attached to the mouse's tail. For sham animals, the electrode remained inactive, but for lesion animals, the electric current (0.4 mA) was activated for five seconds.

Following this procedure, the electrode was removed, the skin was sutured, and animals were single-housed in a cage containing fresh bedding and food, and a single bottle containing tap water. Loss of body temperature was avoided by placing the cage on a heating pad for 30–60 min during the initial recovery period. Following five–nine days of recovery from surgery, mice were given access to two 25 mL glass cylinder bottles (both containing tap water) in order to habituate the animals to drinking from two bottles in the homecage. Importantly, we have previously shown that lesions of EWcp do not produce changes in locomotor activity or the rate of EtOH elimination [33], nor do they produce changes in anxiety-like behavior [34].

### Ethanol Drinking Procedures

Following four days of drinking tap water from two bottles, individually-housed mice underwent a twelve-day EtOH-drinking experiment during which they received 24-hour access to two bottles: one containing tap water, and one containing varying concentrations of EtOH dissolved in tap water. The experiment consisted of three phases during which mice had access to either: 3% EtOH and H<sub>2</sub>O (Days 1–4), 6% EtOH and H<sub>2</sub>O (Days 5–8), or 10% EtOH and H<sub>2</sub>O (Days 9–12). Higher concentrations of EtOH or other palatable fluids were not tested here because earlier studies indicated that EWcp lesion did not affect preference (or avoidance) of several solutions [33,34]. Mice were weighed and fluid levels from each of the two bottles were recorded on a daily basis between 1000–1200 h. The locations of the bottles on the cages (left vs. right) were alternated daily to avoid the potential confound of an inherent side preference.

### Histology

Immediately following the final day of access to 10% EtOH, mice were euthanized by CO<sub>2</sub> inhalation. Brains were rapidly dissected, post-fixed overnight in 2% paraformaldehyde in phosphate-buffered saline (PBS), and cryoprotected in 30% sucrose in PBS until saturation. Coronal slices of the midbrain, 30 μm thick, were collected using a CM1850 cryostat (Leica Microsystems) and placed into PBS containing 0.3% NaN<sub>3</sub> for storage. Six to eight sections spanning the rostral-caudal extent of the EWcp were selected from each animal and underwent Thionin staining. Sections were mounted on clear glass slides, coverslipped, and viewed with the 5× objective on a Leica DM4000 microscope for examination of the location of the lesion (and verification of the absence of damage in sham mice). Images were acquired with the MicroPublisher 3.3 RTV in conjunction with Q-Capture (Q-Imaging, Surrey, BC, Canada). Animals containing lesions that

resulted in destruction of a large portion of the EWcp were included in the “Lesion” group, and all sham animals were included in the “Sham” group for statistical analysis of drinking data. An experimenter blinded to the behavioral data was responsible for excluding mice based on incorrect placement of the lesion.

### Statistical Analysis – Ethanol Drinking

Based on the appropriate concentration, EtOH consumption in mL was converted to grams and divided by the animal’s body weight to give daily intake scores expressed in grams per kilogram (g/kg). Daily EtOH preference was calculated by dividing EtOH consumption in mL by the total fluid consumption in mL (EtOH consumption + H<sub>2</sub>O consumption). Total fluid consumption scores were divided by the animal’s body weight to give values expressed in mL/kg. Data points across each of the four days of drinking at the 3%, 6%, and 10% concentrations of EtOH were averaged within each animal to produce a single value for EtOH intake (g/kg), EtOH preference, and total fluid consumption (mL/kg) at each of the three phases of the experiment.

Each dependent variable was analyzed by a 2×2×3 repeated measures ANOVA design with genotype (KO, WT) and surgery (Sham, Lesion) as the between-subjects factors, and EtOH concentration (3%, 6%, 10%) as the repeated measure. Significant interactions with EtOH concentration were followed by simple main effect analyses evaluating the impact of surgery and genotype among the three EtOH concentrations. Significant interactions between surgery and genotype were followed by simple main effect analyses evaluating the impact of EtOH concentration and surgery among the two genotypes. Post-hoc comparisons between the four individual groups at each of the three phases of the experiment were made using Bonferroni contrasts corrected for multiple comparisons (significance threshold at  $p < .0083$ ). For all analyses other than post-hoc comparisons, significance threshold was set at  $p < .05$ . Data are expressed as mean + standard error of the mean (SEM).

### Conditioning Apparatus

The apparatus for EtOH conditioning consisted of four identical boxes measuring 30×15×15 cm that contained six detectors placed 2.2 cm above the floor for acquisition of spatial location and locomotor activity data. The conditioned stimuli consisted of two unbiased tactile cues: “grid” and “hole” floors, which were interchangeable within the apparatus. This allowed the experimenter to arrange the cues in either a “split” configuration (for Pre-Test and Test), or a “matching” configuration (for Conditioning). The apparatus and conditioned stimuli have been described in detail elsewhere [46].

### Ethanol Conditioning Procedures

In the first set of conditioning experiments (EtOH-CPP), male and female Ucn1 and CRF-R2 KO and WT littermate mice ( $n = 7–15$  per line, per sex, per genotype) were tested for the conditioned rewarding effects of EtOH using a slight variant of a well-established, unbiased place conditioning protocol in which pre-session exposure to EtOH results in a significant preference for the EtOH-paired environment [46].

On Day 1 (Pre-Test), mice were weighed and given a saline injection (12.5 mL/kg, i.p.) before being placed into the apparatus containing the two different tactile floor cues (“split” configuration; one floor on each side of the chamber) for 30 min. On Days 2–9, mice underwent daily 5-min conditioning trials. Mice in the “Grid+” subgroup were weighed and injected with EtOH (2 g/kg, 20% v/v, i.p.) immediately before being placed into the apparatus

containing the *grid* floor cue (“matching” configuration; same floor on both sides of the chamber). On alternating days, mice were weighed and injected with saline before being placed into the apparatus containing the *hole* floor cue on both sides of the chamber. Mice in the “Grid-” (or “Hole+”) subgroup were treated in a manner opposite from that of Grid+ mice, such that they were weighed and injected with EtOH prior to being placed into the apparatus containing the *hole* floor cues on both sides, while on alternating days, they were weighed and injected with saline prior to being placed into the apparatus containing the *grid* floor on both sides. On Day 10, all mice were weighed and received a saline injection before being placed into the apparatus containing both floor cues (one on each side) for 30 min.

In the second set of conditioning experiments (EtOH-CPA), male and female Ucn1 KO and WT littermate mice ( $n = 14–23$  per sex, per genotype) were tested for the conditioned aversive effects of EtOH using a slight variant of a well-established protocol in which post-session exposure to EtOH results in a significant aversion of the EtOH-paired environment [46,47]. The protocol used for EtOH-CPA was identical to that described for EtOH-CPP, except that mice were weighed and injected with either EtOH or saline immediately *after* being removed from the apparatus on Days 1–9. A post-session injection on Day 10 was unnecessary, because the experiment was complete by the end of the behavioral Test session. Importantly, the dose and preparation of EtOH were identical for CPP and CPA experiments.

In order to minimize variation in the conditioning response that could occur based on conditioning subgroup (Grid+ vs. Grid-), conditioning order (EtOH/saline vs. saline/EtOH), and side of the EtOH-paired floor during Pre-Test and Test (left vs. right), all of these variables were fully counterbalanced among all groups in all conditioning experiments.

### Statistical Analysis – Ethanol Conditioning

The percent time spent on the grid floor on Day 10 (Test) relative to Day 1 (Pre-Test) was used as the dependent variable ( $\Delta$  %Time on Grid Floor). Because three-way ANOVAs of all conditioning experiments yielded no significant main or interacting effects of sex, analyses were collapsed across males and females, and data were analyzed by two-way ANOVA with between-subjects factors of genotype (KO, WT) and subgroup (Grid+, Grid-). Significant interactions between genotype and subgroup were followed by simple main effect analyses evaluating the impact of subgroup separately across the two genotypes. For all conditioning analyses, significance threshold was set at  $p < .05$ . Data are expressed as mean  $\pm$  SEM.

## Results

### Histology

Of the 51 mice that received lesion surgery, Thionin-stained tissue revealed successful targeting and ablation of the EWcp in 29 cases. Importantly, the percentage of successful surgeries was not significantly different between Ucn1 KO and WT mice (16/27 vs. 13/24). Successful lesions were targeted primarily to the anterior and medial EWcp (−3.4 mm from bregma), and caused destruction of this region with minimal damage to surrounding areas (Figure 1A). Animals that received sham surgery showed no evidence of damage to the EWcp or surrounding tissue (Figure 1B).

### EWcp lesion decreases EtOH intake

The initial analysis of EtOH intake indicated differential effects of surgery across the three concentrations (surgery x concentration interaction;  $F_{2,120} = 7.14$ ,  $p < .005$ ; Figure 2A). Follow-up analyses

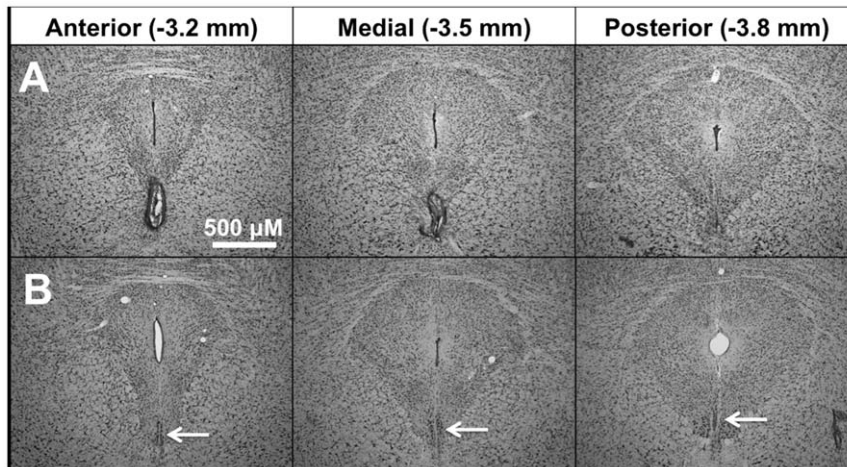

**Figure 1. EWcp lesion histology.** Representative photomicrographs of Thionin-stained sections from anterior, medial, and posterior EWcp (numbers indicate distance from bregma) taken from mice that underwent (A) successful EWcp lesion surgery or (B) sham surgery. Lesions generally ablated large portions of the anterior and medial EWcp, leaving minimal damage to surrounding tissue. Sham animals displayed no evidence of damage to the EWcp, despite occasional visibility of the electrode tract (posterior panel). White arrows point toward intact EWcp observed in sham animals.

doi:10.1371/journal.pone.0026997.g001

revealed that EWcp lesion significantly reduced intake at the 6% and 10% concentrations of EtOH (simple main effects of surgery; both  $F_{1,60} > 7.2$ , both  $p < .01$ ), but not the 3% concentration of EtOH ( $p = .65$ ).

Although EWcp lesion appeared to differentially affect Ucn1 KO and WT mice at the 6% concentration of EtOH, this interaction did not reach significance ( $p = .103$ ). Nevertheless, post-hoc comparisons at the 6% concentration revealed greater intakes in the WT-Sham group relative to both the WT-Lesion group ( $p = .002$ ) and the KO-Sham group ( $p = .005$ ). No other between-group comparisons were significant, indicating that EWcp lesion dampened 6% EtOH intake only in mice expressing Ucn1, and that deletion of Ucn1 dampened 6% EtOH intake only in mice with an intact EWcp.

However, at the 10% concentration of EtOH, the simple main effect of surgery was far from interacting significantly with genotype ( $p = .85$ ), indicating that EWcp lesion was equally effective at reducing intake of 10% EtOH in both Ucn1 KO and WT mice.

#### Deletion of Ucn1 decreases EtOH preference only in mice with an intact EWcp, and EWcp lesion decreases EtOH preference only in mice expressing Ucn1

Analysis of EtOH preference indicated that there were differential effects of surgery across the two genotypes (surgery x genotype interaction;  $F_{1,60} = 5.55$ ,  $p < .05$ ). Follow-up analysis revealed that while EtOH preference was significantly dampened by destruction of the EWcp in Ucn1 WT mice (simple main effect of surgery;  $F_{1,28} = 22.28$ ,  $p = .0001$ ), EWcp lesion had no effect on preference in Ucn1 KO mice ( $p = .84$ ). Furthermore, while preference increased in parallel with greater concentrations of EtOH among Ucn1 WT mice (simple main effect of concentration;  $F_{2,56} = 3.24$ ,  $p < .05$ ), Ucn1 KO mice were strikingly resistant to effects of EtOH concentration on preference ( $p = .36$ ).

The conclusion that deletion of Ucn1 dampened EtOH preference only in Sham mice but not Lesion mice, and that EWcp lesion dampened EtOH preference only in Ucn1 WT mice but not Ucn1 KO mice, was supported by post-hoc comparisons at the 6% and 10% concentrations of EtOH, in which the WT-Sham

group displayed significantly greater preference than each of the other three groups (all  $p \leq .005$ ). No other group comparisons reached significance (all  $p > .25$ ).

#### Deletion of Ucn1 and/or lesion of EWcp do not alter total fluid consumption

Total fluid consumption varied significantly across the different concentrations of EtOH (main effect of concentration;  $F_{2,120} = 4.50$ ,  $p < .05$ ; Figure 2C). However, no main or interacting effects with surgery or genotype were found, and no significant post-hoc comparisons were identified between any of the four groups at any of the three EtOH concentrations.

#### Deletion of Ucn1 abolishes EtOH-induced CPP

Consistent with previous studies demonstrating the unbiased nature of the tactile floor cues used in our EtOH conditioning studies [48], Ucn1 KO and WT mice spent approximately 50% of their time on the grid floor during the Pre-Test, and this did not differ by genotype or subgroup (data not shown). Following conditioning, preference for the EtOH-paired floor was apparent in Ucn1 WT mice, but not Ucn1 KO mice (genotype x subgroup interaction;  $F_{1,45} = 4.96$ ,  $p < .05$ ; Figure 3A). The conclusion that deletion of Ucn1 abolished EtOH-induced CPP was supported by simple main effect analyses evaluating the impact of subgroup separately across the two genotypes. While strong conditioning was apparent in Ucn1 WT mice (simple main effect of subgroup;  $F_{1,26} = 14.45$ ,  $p < .001$ ), this effect was not apparent in Ucn1 KO mice ( $p = .99$ ).

#### Deletion of CRF-R2 abolishes EtOH-induced CPP

Similar to Ucn1 KO and WT mice, CRF-R2 KO and WT mice spent approximately half of their time on the grid floor during the Pre-Test, and this did not differ across genotypes or subgroups (data not shown). Following conditioning, preference for the EtOH-paired floor was apparent in CRF-R2 WT mice, but not CRF-R2 KO mice (genotype x subgroup interaction;  $F_{1,31} = 6.22$ ,  $p < .05$ ; Figure 3B). The conclusion that deletion of CRF-R2 abolished EtOH-induced CPP was supported by simple main effect analyses, in which strong conditioning was apparent in

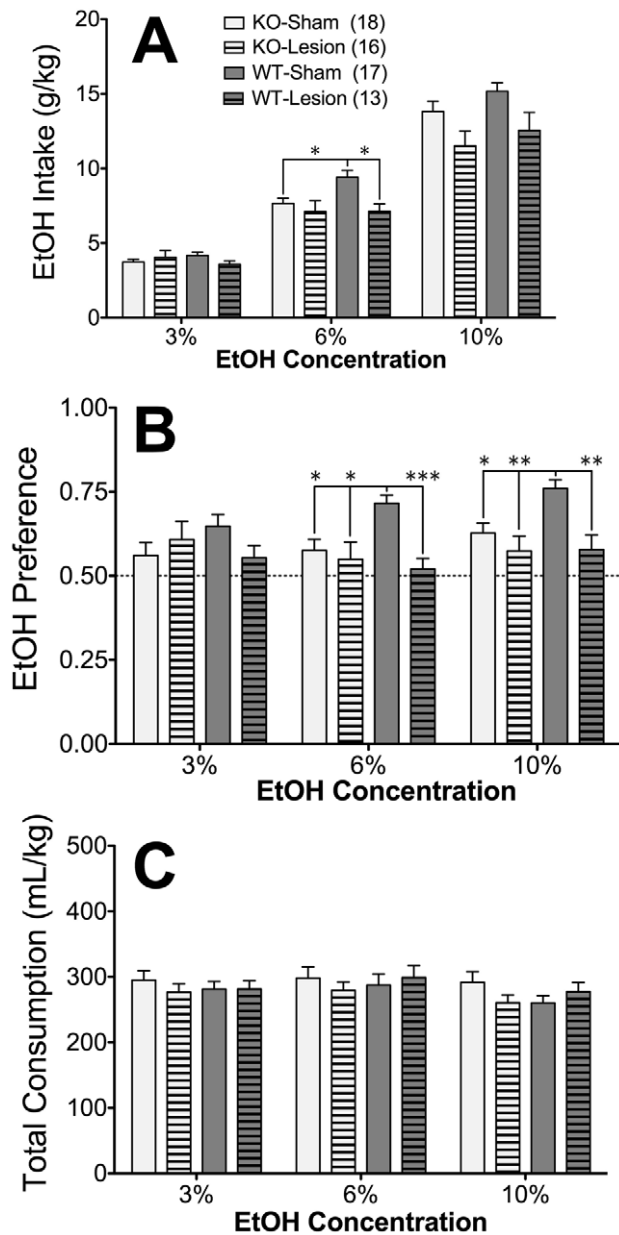

**Figure 2. Effects of EWcp lesion on 2-BC EtOH drinking in Ucn1 KO and WT mice.** (A) EtOH Intake (g/kg), (B) EtOH Preference, and (C) Total Fluid Consumption (mL/kg) of male Ucn1 KO and WT mice following either sham surgery or EWcp lesion. Asterisks indicate significant difference from the respective WT-Sham group (\* $p \leq .005$ , \*\* $p \leq .001$ , \*\*\* $p < .0001$ ). Numbers in parentheses indicate group sizes. The same animals contributed to panels A, B, and C. doi:10.1371/journal.pone.0026997.g002

CRF-R2 WT mice (simple main effect of subgroup;  $F_{1,15} = 25.24$ ,  $p < .0005$ ), but not CRF-R2 KO mice ( $p = .56$ ).

#### Deletion of Ucn1 does not alter EtOH-induced CPA

In a separate experiment using an EtOH conditioning protocol that produces CPA rather than CPP, Ucn1 KO and WT mice again spent approximately 50% of their time on the grid floor during the Pre-Test, and this did not differ by genotype or subgroup (data not shown). While EtOH conditioning resulted in a significant CPA (main effect of subgroup;  $F_{1,68} = 5.25$ ,  $p < .05$ ;

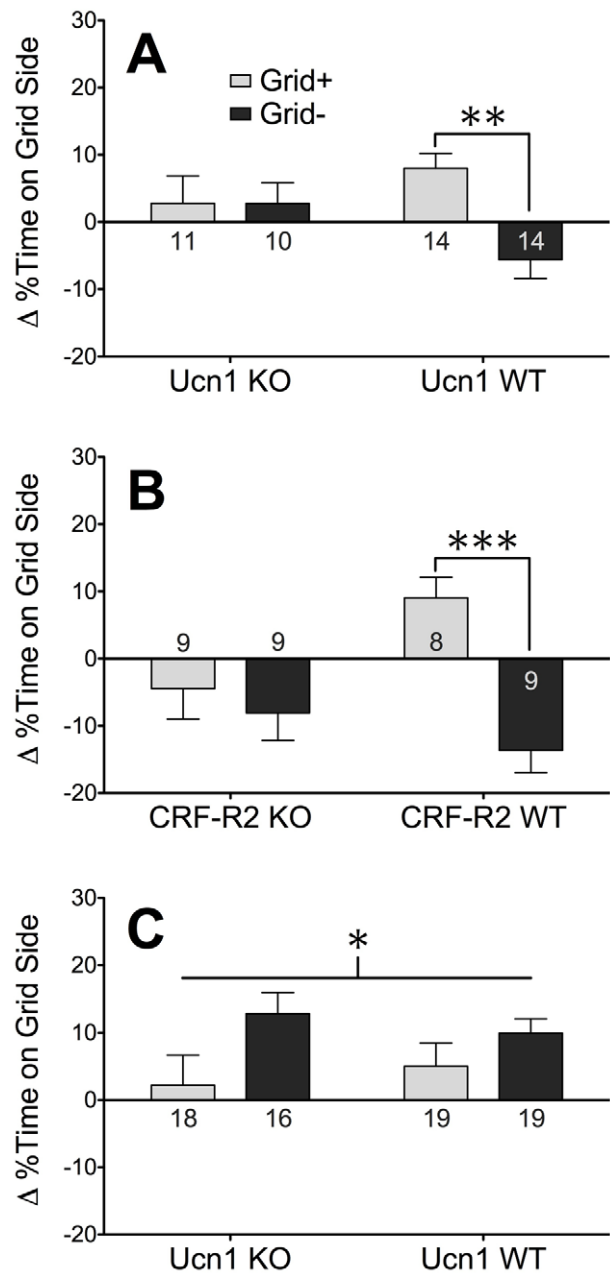

**Figure 3. Involvement of Ucn1 and CRF-R2 in EtOH-induced reward and aversion.** Graphs show percent change in time spent on Grid Floor between the Pre-Test and the Test following (A) EtOH-CPA in Ucn1 KO and WT mice, (B) EtOH-CPA in CRF-R2 KO and WT mice, and (C) EtOH-CPA in Ucn1 KO and WT mice. Multiple asterisks indicate significant difference between WT subgroups (\*\* $p < .001$ , \*\*\* $p < .0005$ ). Single asterisk indicates significant main effect of subgroup (\* $p < .05$ ). Numbers in bars indicate group sizes. doi:10.1371/journal.pone.0026997.g003

Figure 3C), this effect did not interact significantly with genotype ( $p = .40$ ), indicating that Ucn1 KO and WT mice were equally sensitive to the conditioned aversive effects of EtOH.

#### Discussion

The principal findings of the current study were that EtOH intake and preference depended on an interaction between whether or not mice expressed Ucn1, and whether or not mice

had received surgical ablation of the EWcp. In addition, we demonstrated that Ucn1 signaling (most likely via CRF-R2) is necessary for the conditioned rewarding effects of EtOH, and that this cannot be attributable to a generalized learning deficit in Ucn1 KO mice. Together, these results indicate that EWcp-Ucn1 neurons influence the magnitude of EtOH intake and preference for EtOH-containing fluids, and that this involvement is likely related to Ucn1's role in mediating sensitivity to the rewarding, but not aversive, effects of EtOH.

Although EWcp lesion and/or deletion of Ucn1 were both capable of attenuating measures of EtOH consumption, it is important to note that these manipulations differentially affected the outcomes of EtOH intake vs. EtOH preference. When examining EtOH intake, our analyses revealed that EWcp lesion reduced drinking in both Ucn1 KO and WT mice. Although examination of the 6% concentration suggested a potential interaction between genotype and surgery, examination of the 10% concentration indicated that EWcp lesion was equally effective at reducing EtOH-drinking in both Ucn1 KO and WT mice. The fact that EWcp lesion decreased 10% intake in mice lacking Ucn1 suggests that other neural systems in the EWcp besides Ucn1 may also contribute to intake of 10% EtOH.

Indeed, the receptor for the orexigenic peptide, ghrelin (growth hormone secretagogue receptor; Ghnr) is densely expressed in the mouse EWcp [36], and our laboratory reported that systemic administration of a Ghnr antagonist not only prevented EtOH-induced neural activity within the EWcp, but also reduced intake of 20% EtOH in a model of binge-like drinking [16]. Furthermore, the receptor for the anorexigenic peptide, leptin (Lepr) is also expressed in the mouse EWcp, and Lepr signaling increases the expression of Ucn1 peptide by directly activating EWcp neurons [39]. In addition, mutant mice that are either leptin-deficient (*ob/ob*) or leptin-resistant (*db/db*) showed decreased EtOH preference relative to their wild-type littermates in a 2-BC procedure [49]. These studies suggest that signaling via EW-Ghnr and/or EW-Lepr may be important for EWcp-Ucn1's effects on EtOH preference and reward. Finally, Ucn1 is also highly colocalized in the EWcp with the anorexigenic neuropeptide cocaine- and amphetamine-regulated transcript (CART) [35,50], and although a role for CART in EtOH-related behaviors has been supported by several studies [51–53], the contribution of EWcp-CART neurons to these phenotypes has not yet been thoroughly examined.

The EWcp also expresses high levels of the peptides cholecystokinin, nesfatin-1, and neuropeptide B [54–57]. Since these peptides have anorexic properties, it is logical to assume that they could also contribute to EWcp's involvement in consummatory behaviors. This would be in agreement with our observations that EWcp lesions can alter fluid consumption [33,34]. However, the reductions in EtOH intake observed here were not simply due to a non-specific decrease in consumption, because the total volume of fluid consumption was not affected (Fig. 2C), and the effect on EtOH preference was dependent on both Ucn1 genotype and the type of surgery, as discussed below.

In contrast to effects on EtOH intake, analysis of EtOH preference revealed a significant interaction between surgery and genotype. Post-hoc comparisons at concentrations of both 6% and 10% confirmed that deletion of Ucn1 reduced preference only in mice with an intact EWcp, and that lesion of EWcp reduced preference only in mice expressing Ucn1. These findings provide strong evidence that EWcp-Ucn1 neurons are necessary for driving high EtOH preference, and suggest that our previous report of dampened EtOH preference in EWcp-lesioned B6 mice can be attributed primarily to the reduction of Ucn1-positive terminals

within EWcp target regions [33]. The potential dissociation between Ucn1's involvement in regulation of EtOH preference and the contribution of other EWcp peptide systems to regulation of EtOH intake is intriguing, and requires further investigation.

One potential caveat of examining genetically-engineered KO mice is that observed effects can sometimes be better attributed to developmental compensations within systems related to the deleted gene, rather than to the absence of the gene itself. In fact, one possible explanation for why we uncovered a role for Ucn1 in EtOH preference, but not EtOH intake is that this effect was masked by developmental compensations in Ucn1 KO mice. However, because Ucn1 is the only component of the CRF system that is expressed in the EWcp, and because the EWcp is the primary site of Ucn1 expression in the mammalian brain [58–60], our observation that EWcp lesion differentially affected EtOH preference in Ucn1 KO and WT mice suggests that the effects of Ucn1 deletion on EtOH-related behaviors can be primarily ascribed to the actions of EWcp-Ucn1 neurons. Furthermore, we have previously shown that Ucn1 is only expressed postnatally in the EWcp [61], limiting the potential impact of compensations on development. Indeed, converging lines of evidence provide additional support for the involvement of EWcp-Ucn1 neurons in EtOH sensitivity [14,31].

The current data complement a wealth of existing literature on the contribution of specific components of the CRF system to EtOH-related behaviors. Importantly, the function of EWcp-Ucn1 neurons appears to differ substantially from the role of CRF-containing neurons in the central nucleus of the amygdala (CeA). While we speculate that the involvement of EWcp-Ucn1 neurons in EtOH preference and reward predominates during the initial stages of the addiction process, CeA-CRF neurons are thought to be integral for the transition to EtOH addiction and the negative reinforcement processes that prevail during dependence and withdrawal [62,63].

For example, excessive release of CeA-CRF occurs during EtOH withdrawal [64,65], CeA-CRF mRNA is upregulated following EtOH dependence [66,67], and CRF's ability to release GABA from CeA interneurons is potentiated in EtOH-dependent rats [67]. Although we have not yet ruled out a potential role for Ucn1 in EtOH dependence, the current results support a general framework in which CRF and CRF-related peptides display unique relationships with distinct aspects of the addiction process. Indeed, while CRF is required for EtOH-induced psychomotor sensitization and binge-like EtOH intake, it appears that Ucn1 is not critical for these behaviors [42,43].

It is important to note that although Ucn1 binds with high affinity to both CRF receptors [24,25], it remains unclear specifically which EtOH-related behaviors involve EWcp-Ucn1 actions at CRF-R1 vs. CRF-R2. Numerous reports have demonstrated that genetic deletion or pharmacological blockade of CRF-R1 decreases EtOH consumption [42,68–70], and these effects are generally more pronounced in animals with an extensive history of EtOH exposure [67,71–77].

In contrast, several studies have concluded that CRF-R2 signaling acts to decrease EtOH consumption [70,78,79]. However, CRF-R2 regulation of behavior is often reported as bi-directional [80–82], and one study demonstrated that intra-CeA CRF-R2 activation had opposing effects on EtOH self-administration in dependent vs. non-dependent rats [83]. Indeed, the observations that deletion of CRF-R2 blocked EtOH-CPP (Fig. 3B) and protected against prolonged increases in EtOH preference following stress [84] indicate that the precise role of CRF-R2 signaling in EtOH-related behavior may rely on a complex interaction between several experimental variables.

Because earlier studies from our laboratory found that EWcp lesion decreased the number of Ucn1-positive terminals in the lateral septum and dorsal raphe nucleus [33], and because CRF-R2 expression is enriched in those areas relative to CRF-R1 [85,86], we have hypothesized that EWcp-Ucn1 mediates its effects on EtOH-related behaviors primarily via CRF-R2 rather than CRF-R1. Although this idea is supported by our observation that Ucn1 KO mice and CRF-R2 KO mice are both resistant to EtOH-CPP (suggesting that Ucn1 acts via CRF-R2 to mediate the conditioned rewarding effects of EtOH), this hypothesis awaits further confirmation. Nevertheless, accumulating evidence suggests that the importance of urocortin peptides and CRF-R2 signaling in mediating emotional states [87,88] and drug-induced behaviors [89,90] remains underappreciated.

In summary, we utilized two complementary methods (genetic knockout of Ucn1 and electrolytic lesion of EWcp) in an examination of 2-BC EtOH consumption, and accompanied these studies with place conditioning experiments capable of dissociating sensitivity to the rewarding vs. aversive effects of EtOH. Taken together, our results implicate the EWcp in EtOH

intake, EWcp-Ucn1 neurons in EtOH preference, and Ucn1/CRF-R2 in EtOH-induced reward. Future studies examining different drinking paradigms, different concentrations of EtOH, potential effects of dependence, and additional EtOH-related behaviors will assist in delineating the specific components of the CRF system (and the specific neural substrates) that work in concert to drive the progression of EtOH addiction.

## Acknowledgments

We thank Dr. Wylie Vale for providing Ucn1 KO breeder mice, Dr. Mary Stenzel-Poore for providing the CRF-R2 KO breeder mice, Ju Li and Dawn M. Cote for maintaining and genotyping the KO mouse colonies, and Travis M. Moschak for consultation on statistical analyses.

## Author Contributions

Conceived and designed the experiments: WJG CLC AER. Performed the experiments: WJG DLC. Analyzed the data: WJG DLC. Contributed reagents/materials/analysis tools: CLC. Wrote the paper: WJG AER. Established surgical and histological techniques: SK.

## References

1. Koob GF, Le Moal M (2008) Review. Neurobiological mechanisms for opponent motivational processes in addiction. *Philos Trans R Soc Lond B Biol Sci* 363: 3113–3123.
2. Koob GF, Roberts AJ, Schulteis G, Parsons LH, Heyser CJ, et al. (1998) Neurocircuitry targets in ethanol reward and dependence. *Alcohol Clin Exp Res* 22: 3–9.
3. Koob GF (2003) Alcoholism: allostasis and beyond. *Alcohol Clin Exp Res* 27: 232–243.
4. Crabbe JC, Phillips TJ, Harris RA, Arends MA, Koob GF (2006) Alcohol-related genes: contributions from studies with genetically engineered mice. *Addict Biol* 11: 195–269.
5. Chang SL, Patel NA, Romero AA (1995) Activation and desensitization of Fos immunoreactivity in the rat brain following ethanol administration. *Brain Res* 679: 89–98.
6. Ryabinin AE, Criado JR, Henriksen SJ, Bloom FE, Wilson MC (1997) Differential sensitivity of c-Fos expression in hippocampus and other brain regions to moderate and low doses of alcohol. *Mol Psychiatry* 2: 32–43.
7. Knapp DJ, Braun CJ, Duncan GE, Qian Y, Fernandes A, et al. (2001) Regional specificity of ethanol and NMDA action in brain revealed with FOS-like immunohistochemistry and differential routes of drug administration. *Alcohol Clin Exp Res* 25: 1662–1672.
8. Murphy NP, Sakoori K, Okabe C (2006) Lack of evidence of a role for the neurosteroid allopregnanolone in ethanol-induced reward and c-fos expression in DBA/2 mice. *Brain Res* 1094: 107–118.
9. Topple AN, Hunt GE, McGregor IS (1998) Possible neural substrates of beer-craving in rats. *Neurosci Lett* 252: 99–102.
10. Bachtell RK, Wang YM, Freeman P, Risinger FO, Ryabinin AE (1999) Alcohol drinking produces brain region-selective changes in expression of inducible transcription factors. *Brain Res* 847: 157–165.
11. Weitemier AZ, Woerner A, Backstrom P, Hyytia P, Ryabinin AE (2001) Expression of c-Fos in Alko alcohol rats responding for ethanol in an operant paradigm. *Alcohol Clin Exp Res* 25: 704–710.
12. Ryabinin AE, Bachtell RK, Freeman P, Risinger FO (2001) ITF expression in mouse brain during acquisition of alcohol self-administration. *Brain Res* 890: 192–195.
13. Ryabinin AE, Galvan-Rosas A, Bachtell RK, Risinger FO (2003) High alcohol/sucrose consumption during dark circadian phase in C57BL/6j mice: involvement of hippocampus, lateral septum and urocortin-positive cells of the Edinger-Westphal nucleus. *Psychopharmacology (Berl)* 165: 296–305.
14. Bachtell RK, Weitemier AZ, Galvan-Rosas A, Tsivkovskaia NO, Risinger FO, et al. (2003) The Edinger-Westphal-lateral septum urocortin pathway and its relationship to alcohol consumption. *J Neurosci* 23: 2477–2487.
15. Sharpe AL, Tsivkovskaia NO, Ryabinin AE (2005) Ataxia and c-Fos expression in mice drinking ethanol in a limited access session. *Alcohol Clin Exp Res* 29: 1419–1426.
16. Kaur S, Ryabinin AE (2010) Ghrelin receptor antagonism decreases alcohol consumption and activation of periaqueductal urocortin-containing neurons. *Alcohol Clin Exp Res* 34: 1525–1534.
17. Anacker AM, Loftis JM, Kaur S, Ryabinin AE (2011) Prairie voles as a novel model of socially facilitated excessive drinking. *Addict Biol* 16: 92–107.
18. Cavani JA, Reiner A, Cuthbertson SL, Bittencourt JC, Toledo CA (2003) Evidence that urocortin is absent from neurons of the Edinger-Westphal nucleus in pigeons. *Braz J Med Biol Res* 36: 1695–1700.
19. Weitemier AZ, Tsivkovskaia NO, Ryabinin AE (2005) Urocortin 1 distribution in mouse brain is strain-dependent. *Neuroscience* 132: 729–740.
20. Ryabinin AE, Tsivkovskaia NO, Ryabinin SA (2005) Urocortin 1-containing neurons in the human Edinger-Westphal nucleus. *Neuroscience* 134: 1317–1323.
21. Kozicz T, Bittencourt JC, May PJ, Reiner A, Gamlin PD, et al. (2011) The Edinger-Westphal nucleus: a historical, structural, and functional perspective on a dichotomous terminology. *J Comp Neurol* 519: 1413–1434.
22. Bachtell RK, Tsivkovskaia NO, Ryabinin AE (2002) Strain differences in urocortin expression in the Edinger-Westphal nucleus and its relation to alcohol-induced hypothermia. *Neuroscience* 113: 421–434.
23. Spangler E, Cote DM, Anacker AM, Mark GP, Ryabinin AE (2009) Differential sensitivity of the periaqueductal urocortin-containing neurons to ethanol, psychostimulants and stress in mice and rats. *Neuroscience* 160: 115–125.
24. Vaughan J, Donaldson C, Bittencourt J, Perrin MH, Lewis K, et al. (1995) Urocortin, a mammalian neuropeptide related to fish urotensin I and to corticotropin-releasing factor. *Nature* 378: 287–292.
25. Lewis K, Li C, Perrin MH, Blount A, Kunitake K, et al. (2001) Identification of urocortin III, an additional member of the corticotropin-releasing factor (CRF) family with high affinity for the CRF2 receptor. *Proc Natl Acad Sci U S A* 98: 7570–7575.
26. Valdez GR, Roberts AJ, Chan K, Davis H, Brennan M, et al. (2002) Increased ethanol self-administration and anxiety-like behavior during acute ethanol withdrawal and protracted abstinence: regulation by corticotropin-releasing factor. *Alcohol Clin Exp Res* 26: 1494–1501.
27. Le AD, Harding S, Juzysch W, Fletcher PJ, Shaham Y (2002) The role of corticotropin-releasing factor in the median raphe nucleus in relapse to alcohol. *J Neurosci* 22: 7844–7849.
28. Turek VF, Tsivkovskaia NO, Hyytia P, Harding S, Le AD, et al. (2005) Urocortin 1 expression in five pairs of rat lines selectively bred for differences in alcohol drinking. *Psychopharmacology (Berl)* 181: 511–517.
29. Fonareva I, Spangler E, Cannella N, Sabino V, Cottone P, et al. (2009) Increased periaqueductal urocortin 1 immunoreactivity in genetically selected alcohol preferring rats. *Alcohol Clin Exp Res* 33: 1956–1965.
30. Kiianmaa K, Hyytia P, Samson HH, Engel JA, Svensson L, et al. (2003) New neuronal networks involved in ethanol reinforcement. *Alcohol Clin Exp Res* 27: 209–219.
31. Ryabinin AE, Weitemier AZ (2006) The urocortin 1 neurocircuit: ethanol-sensitivity and potential involvement in alcohol consumption. *Brain Res Rev* 52: 368–380.
32. Turek VF, Bennett B, Ryabinin AE (2008) Differences in the urocortin 1 system between long-sleep and short-sleep mice. *Genes Brain Behav* 7: 113–119.
33. Bachtell RK, Weitemier AZ, Ryabinin AE (2004) Lesions of the Edinger-Westphal nucleus in C57BL/6j mice disrupt ethanol-induced hypothermia and ethanol consumption. *Eur J Neurosci* 20: 1613–1623.
34. Weitemier AZ, Ryabinin AE (2005) Lesions of the Edinger-Westphal nucleus alter food and water consumption. *Behav Neurosci* 119: 1235–1243.
35. Kozicz T (2003) Neurons colocalizing urocortin and cocaine and amphetamine-regulated transcript immunoreactivities are induced by acute lipopolysaccharide stress in the Edinger-Westphal nucleus in the rat. *Neuroscience* 116: 315–320.
36. Zigman JM, Jones JE, Lee CE, Saper CB, Elmquist JK (2006) Expression of ghrelin receptor mRNA in the rat and the mouse brain. *J Comp Neurol* 494: 528–548.
37. Gaszner B, Korosi A, Palkovits M, Roubos EW, Kozicz T (2007) Neuropeptide Y activates urocortin 1 neurons in the nonpreganglionic Edinger-Westphal nucleus. *J Comp Neurol* 500: 708–719.

38. Xu L, Bloem B, Gaszner B, Roubos EW, Kozicz T (2009) Sex-specific effects of fasting on urocortin 1, cocaine- and amphetamine-regulated transcript peptide and nesfatin-1 expression in the rat Edinger-Westphal nucleus. *Neuroscience* 162: 1141–1149.
39. Xu L, Scheenen WJ, Leshan RL, Patterson CM, Elias CF, et al. (2011) Leptin signaling modulates the activity of urocortin 1 neurons in the mouse nonpreganglionic Edinger-Westphal nucleus. *Endocrinology* 152: 979–988.
40. Vetter DE, Li C, Zhao L, Contarino A, Liberian MC, et al. (2002) Urocortin-deficient mice show hearing impairment and increased anxiety-like behavior. *Nat Genet* 31: 363–369.
41. Coste SC, Kesterson RA, Heldwein KA, Stevens SL, Heard AD, et al. (2000) Abnormal adaptations to stress and impaired cardiovascular function in mice lacking corticotropin-releasing hormone receptor-2. *Nat Genet* 24: 403–409.
42. Kaur S, Li J, Stenzel-Poore M, Ryabinin AE. Corticotropin-releasing factor acting on corticotropin-releasing factor receptor type 1 is critical for binge alcohol drinking in mice. *Alcohol Clin Exp Res* in press.
43. Pastor R, McKinnon CS, Scibelli AC, Burkhart-Kasch S, Reed C, et al. (2008) Corticotropin-releasing factor-1 receptor involvement in behavioral neuroadaptation to ethanol: a urocortin1-independent mechanism. *Proc Natl Acad Sci U S A* 105: 9070–9075.
44. Yoneyama N, Crabbe JC, Ford MM, Murillo A, Finn DA (2008) Voluntary ethanol consumption in 22 inbred mouse strains. *Alcohol* 42: 149–160.
45. Cunningham CL, Niehus DR, Malott DH, Prather LK (1992) Genetic differences in the rewarding and activating effects of morphine and ethanol. *Psychopharmacology (Berl)* 107: 385–393.
46. Cunningham CL, Gremel CM, Groblewski PA (2006) Drug-induced conditioned place preference and aversion in mice. *Nat Protoc* 1: 1662–1670.
47. Cunningham CL, Henderson CM (2000) Ethanol-induced conditioned place aversion in mice. *Behav Pharmacol* 11: 591–602.
48. Cunningham CL, Ferree NK, Howard MA (2003) Apparatus bias and place conditioning with ethanol in mice. *Psychopharmacology (Berl)* 170: 409–422.
49. Blednov YA, Walker D, Harris RA (2004) Blockade of the leptin-sensitive pathway markedly reduces alcohol consumption in mice. *Alcohol Clin Exp Res* 28: 1683–1692.
50. Koylu EO, Couceyro PR, Lambert PD, Kuhar MJ (1998) Cocaine- and amphetamine-regulated transcript peptide immunohistochemical localization in the rat brain. *J Comp Neurol* 391: 115–132.
51. Days CV, McGranahan TM, Martin-Fardon R, Weiss F (2008) Stimuli linked to ethanol availability activate hypothalamic CART and orexin neurons in a reinstatement model of relapse. *Biol Psychiatry* 63: 152–157.
52. Dandekar MP, Singru PS, Kokare DM, Lechan RM, Thim L, et al. (2008) Importance of cocaine- and amphetamine-regulated transcript peptide in the central nucleus of amygdala in anxiogenic responses induced by ethanol withdrawal. *Neuropsychopharmacology* 33: 1127–1136.
53. King BJ, Furlong TM, McNally GP (2010) Cocaine and amphetamine related transcript (CART) inhibits context induced reinstatement of reward seeking. *Behav Neurosci* 124: 423–427.
54. Maciewicz R, Phipps BS, Grenier J, Poletti CE (1984) Edinger-Westphal nucleus: cholecystokinin immunocytochemistry and projections to spinal cord and trigeminal nucleus in the cat. *Brain Res* 299: 139–145.
55. Tanaka H, Yoshida T, Miyamoto N, Motoike T, Kurosu H, et al. (2003) Characterization of a family of endogenous neuropeptide ligands for the G protein-coupled receptors GPR7 and GPR8. *Proc Natl Acad Sci U S A* 100: 6251–6256.
56. Dun SL, Brailoiu GC, Mizuo K, Yang J, Chang JK, et al. (2005) Neuropeptide B immunoreactivity in the central nervous system of the rat. *Brain Res* 1045: 157–163.
57. Foo KS, Brismar H, Broberger C (2008) Distribution and neuropeptide coexistence of nucleobindin-2 mRNA/nesfatin-like immunoreactivity in the rat CNS. *Neuroscience* 156: 563–579.
58. Kozicz T, Yanaihara H, Arimura A (1998) Distribution of urocortin-like immunoreactivity in the central nervous system of the rat. *J Comp Neurol* 391: 1–10.
59. Bittencourt JC, Vaughan J, Arias C, Rissman RA, Vale WW, et al. (1999) Urocortin expression in rat brain: evidence against a pervasive relationship of urocortin-containing projections with targets bearing type 2 CRF receptors. *J Comp Neurol* 415: 285–312.
60. Vasconcelos LA, Donaldson C, Sita LV, Casatti CA, Lotfi CF, et al. (2003) Urocortin in the central nervous system of a primate (*Cebus apella*): sequencing, immunohistochemical, and hybridization histochemical characterization. *J Comp Neurol* 463: 157–175.
61. Cserevenka A, Spangler E, Cote DM, Ryabinin AE (2010) Postnatal developmental profile of urocortin 1 and cocaine- and amphetamine-regulated transcript in the periculomotor region of C57BL/6J mice. *Brain Res* 1319: 33–43.
62. Heilig M, Koob GF (2007) A key role for corticotropin-releasing factor in alcohol dependence. *Trends Neurosci* 30: 399–406.
63. Koob GF (2010) The role of CRF and CRF-related peptides in the dark side of addiction. *Brain Res* 1314: 3–14.
64. Merlo Pich E, Lorang M, Yeganeh M, Rodriguez de Fonseca F, Raber J, et al. (1995) Increase of extracellular corticotropin-releasing factor-like immunoreactivity levels in the amygdala of awake rats during restraint stress and ethanol withdrawal as measured by microdialysis. *J Neurosci* 15: 5439–5447.
65. Zorrilla EP, Valdez GR, Weiss F (2001) Changes in levels of regional CRF-like immunoreactivity and plasma corticosterone during protracted drug withdrawal in dependent rats. *Psychopharmacology (Berl)* 158: 374–381.
66. Sommer WH, Rimondini R, Hansson AC, Hipskind PA, Gehlert DR, et al. (2008) Upregulation of voluntary alcohol intake, behavioral sensitivity to stress, and amygdala *crhr1* expression following a history of dependence. *Biol Psychiatry* 63: 139–145.
67. Roberto M, Cruz MT, Gilpin NW, Sabino V, Schweitzer P, et al. (2010) Corticotropin releasing factor-induced amygdala gamma-aminobutyric Acid release plays a key role in alcohol dependence. *Biol Psychiatry* 67: 831–839.
68. Lodge DJ, Lawrence AJ (2003) The CRF1 receptor antagonist antalarmin reduces volitional ethanol consumption in isolation-reared fawn-hooded rats. *Neuroscience* 117: 243–247.
69. Sparta DR, Sparrow AM, Lowery EG, Fec JR, Knapp DJ, et al. (2008) Blockade of the corticotropin releasing factor type 1 receptor attenuates elevated ethanol drinking associated with drinking in the dark procedures. *Alcohol Clin Exp Res* 32: 259–265.
70. Lowery EG, Spanos M, Navarro M, Lyons AM, Hodge CW, et al. (2010) CRF-1 antagonist and CRF-2 agonist decrease binge-like ethanol drinking in C57BL/6J mice independent of the HPA axis. *Neuropsychopharmacology* 35: 1241–1252.
71. Sabino V, Cottone P, Koob GF, Steardo L, Lee MJ, et al. (2006) Dissociation between opioid and CRF1 antagonist sensitive drinking in Sardinian alcohol-preferring rats. *Psychopharmacology (Berl)* 189: 175–186.
72. Funk CK, Zorrilla EP, Lee MJ, Rice KC, Koob GF (2007) Corticotropin-releasing factor 1 antagonists selectively reduce ethanol self-administration in ethanol-dependent rats. *Biol Psychiatry* 61: 78–86.
73. Chu K, Koob GF, Cole M, Zorrilla EP, Roberts AJ (2007) Dependence-induced increases in ethanol self-administration in mice are blocked by the CRF1 receptor antagonist antalarmin and by CRF1 receptor knockout. *Pharmacol Biochem Behav* 86: 813–821.
74. Gehlert DR, Cippitelli A, Thorsell A, Le AD, Hipskind PA, et al. (2007) 3-(4-Chloro-2-morpholin-4-yl-thiazol-5-yl)-8-(1-ethylpropyl)-2,6-dimethyl- imidazo[1,2-b]pyridazine: a novel brain-penetrant, orally available corticotropin-releasing factor receptor 1 antagonist with efficacy in animal models of alcoholism. *J Neurosci* 27: 2718–2726.
75. Gilpin NW, Richardson HN, Koob GF (2008) Effects of CRF1-receptor and opioid-receptor antagonists on dependence-induced increases in alcohol drinking by alcohol-preferring (P) rats. *Alcohol Clin Exp Res* 32: 1535–1542.
76. Richardson HN, Zhao Y, Fekete EM, Funk CK, Wirsching P, et al. (2008) MPZP: a novel small molecule corticotropin-releasing factor type 1 receptor (CRF1) antagonist. *Pharmacol Biochem Behav* 88: 497–510.
77. Sparta DR, Ferraro FM, 3rd, Fec JR, Knapp DJ, Breese GR, et al. (2009) The alcohol deprivation effect in C57BL/6J mice is observed using operant self-administration procedures and is modulated by CRF-1 receptor signaling. *Alcohol Clin Exp Res* 33: 31–42.
78. Sharpe AL, Coste SC, Burkhart-Kasch S, Li N, Stenzel-Poore MP, et al. (2005) Mice deficient in corticotropin-releasing factor receptor type 2 exhibit normal ethanol-associated behaviors. *Alcohol Clin Exp Res* 29: 1601–1609.
79. Sharpe AL, Phillips TJ (2009) Central urocortin 3 administration decreases limited-access ethanol intake in nondependent mice. *Behav Pharmacol* 20: 346–351.
80. Bale TL, Contarino A, Smith GW, Chan R, Gold LH, et al. (2000) Mice deficient for corticotropin-releasing hormone receptor-2 display anxiety-like behaviour and are hypersensitive to stress. *Nat Genet* 24: 410–414.
81. Henry B, Vale W, Markou A (2006) The effect of lateral septum corticotropin-releasing factor receptor 2 activation on anxiety is modulated by stress. *J Neurosci* 26: 9142–9152.
82. Zhao Y, Valdez GR, Fekete EM, Rivier JE, Vale WW, et al. (2007) Subtype-selective corticotropin-releasing factor receptor agonists exert contrasting, but not opposite, effects on anxiety-related behavior in rats. *J Pharmacol Exp Ther* 323: 846–854.
83. Funk CK, Koob GF (2007) A CRF(2) agonist administered into the central nucleus of the amygdala decreases ethanol self-administration in ethanol-dependent rats. *Brain Res* 1155: 172–178.
84. Pastor R, Reed C, Burkhart-Kasch S, Li N, Sharpe AL, et al. (2011) Ethanol concentration-dependent effects and the role of stress on ethanol drinking in corticotropin-releasing factor type 1 and double type 1 and 2 receptor knockout mice. *Psychopharmacology (Berl)*.
85. Chalmers DT, Lovenberg TW, De Souza EB (1995) Localization of novel corticotropin-releasing factor receptor (CRF2) mRNA expression to specific subcortical nuclei in rat brain: comparison with CRF1 receptor mRNA expression. *J Neurosci* 15: 6340–6350.
86. Van Pett K, Viau V, Bittencourt JC, Chan RK, Li HY, et al. (2000) Distribution of mRNAs encoding CRF receptors in brain and pituitary of rat and mouse. *J Comp Neurol* 428: 191–212.
87. Neufeld-Cohen A, Evans AK, Getselter D, Spyroglou A, Hill A, et al. (2010) Urocortin-1 and -2 double-deficient mice show robust anxiolytic phenotype and modified serotonergic activity in anxiety circuitry. *Mol Psychiatry* 15: 426–441, 339.
88. Neufeld-Cohen A, Tsoory MM, Evans AK, Getselter D, Gil S, et al. (2010) A triple urocortin knockout mouse model reveals an essential role for urocortins in stress recovery. *Proc Natl Acad Sci U S A* 107: 19020–19025.
89. Giardino WJ, Mark GP, Stenzel-Poore MP, Ryabinin AE. Dissociation of corticotropin-releasing factor receptor subtype involvement in sensitivity to locomotor effects of methamphetamine and cocaine. *Psychopharmacology (Berl)* in press.
90. Giardino WJ, Pastor R, Anacker AM, Spangler E, Cote DM, et al. (2011) Dissection of corticotropin-releasing factor system involvement in locomotor sensitivity to methamphetamine. *Genes Brain Behav* 10: 78–89.
